# Supplementary material for: Change in Employment Status in Survivors With Occupational Cancers: A Case Control Study
Source: Research Square preprint supplement (doi:10.21203/rs.3.rs-382321/v1), 2021-04-06
Supplement: Supplementary file 1 [file fb92ab81fde0ff6c2bc444ad.docx]

| **Table S1.** Distribution of year of occupational cancer survivors | | | |
| --- | --- | --- | --- |
| ­Year | Total cancer number (N=382) | | The number of insured (n=218) |
| 1971 | 1 | |  |
| 1981 | 1 | |  |
| 1983 | 2 | | 2 |
| 1984 | 1 | |  |
| 1986 | 5 | |  |
| 1987 | 1 | |  |
| 1988 | 3 | |  |
| 1989 | 6 | | 2 |
| 1990 | 5 | |  |
| 1991 | 7 | | 1 |
| 1992 | 6 | | 2 |
| 1993 | 10 | | 3 |
| 1994 | 10 | | 5 |
| 1995 | 12 | | 4 |
| 1996 | 28 | | 12 |
| 1997 | 63 | | 24 |
| 1998 | 70 | | 33 |
| 1999 | 11 | | 4 |
| 2000 | 10 | | 6 |
| 2001 | 7 | | 7 |
| 2002 | 5 | | 4 |
| 2003 | 12 | | 6 |
| 2004 | 11 | | 11 |
| 2005 | 12 | | 12 |
| 2006 | 6 | | 5 |
| 2007 | 3 | | 3 |
| 2008 | 10 | | 10 |
| 2009 | 6 | | 6 |
| 2010 | 12 | | 12 |
| 2011 | 9 | | 9 |
| 2012 | 8 | | 7 |
| 2013 | 9 | | 9 |
| 2014 | 10 | | 10 |
| 2015 | 6 | | 5 |
| 2016 | 1 | | 1 |
| 2017 | 3 | | 3 |
| Total | 382 | | 218 |
|  | | number of insured | | |

Note. Data are from Labor Insurance Database and NHIRD
